# Supplementary material
Source: publisher figshare collection journal article supplement (https://karger.figshare.com/ndownloader/files/8718478)
Supplement: Supplementary file 1 [file 8718478]

**Appendix**

**Search terms and results for explicit cognitions**

PsychInfo (20 February 2015): 455 records retrieved

1. "parental smoking".mp. [mp=title, abstract, heading word, table of contents, key concepts, original title, tests & measures]

2. "parent smoking".mp. [mp=title, abstract, heading word, table of contents, key concepts, original title, tests & measures]

3. "parental smoke".mp. [mp=title, abstract, heading word, table of contents, key concepts, original title, tests & measures]

4. "parent smoke".mp. [mp=title, abstract, heading word, table of contents, key concepts, original title, tests & measures]

5. "maternal smoking".mp. [mp=title, abstract, heading word, table of contents, key concepts, original title, tests & measures]

6. "maternal smoke".mp. [mp=title, abstract, heading word, table of contents, key concepts, original title, tests & measures]

7. "paternal smoking".mp. [mp=title, abstract, heading word, table of contents, key concepts, original title, tests & measures]

8. "paternal smoke".mp. [mp=title, abstract, heading word, table of contents, key concepts, original title, tests & measures]

9. "mother smoking".mp. [mp=title, abstract, heading word, table of contents, key concepts, original title, tests & measures]

10. "mother smoke".mp. [mp=title, abstract, heading word, table of contents, key concepts, original title, tests & measures]

11. "father smoking".mp. [mp=title, abstract, heading word, table of contents, key concepts, original title, tests & measures]

12. "father smoke".mp. [mp=title, abstract, heading word, table of contents, key concepts, original title, tests & measures]

13. "secondhand smoke".mp. [mp=title, abstract, heading word, table of contents, key concepts, original title, tests & measures]

14. "secondhand smoking".mp. [mp=title, abstract, heading word, table of contents, key concepts, original title, tests & measures]

15. "second-hand smoke".mp. [mp=title, abstract, heading word, table of contents, key concepts, original title, tests & measures]

16. "second-hand smoking".mp. [mp=title, abstract, heading word, table of contents, key concepts, original title, tests & measures]

17. "second hand smoke".mp. [mp=title, abstract, heading word, table of contents, key concepts, original title, tests & measures]

18. "second hand smoking".mp. [mp=title, abstract, heading word, table of contents, key concepts, original title, tests & measures]

19. "household smoking".mp. [mp=title, abstract, heading word, table of contents, key concepts, original title, tests & measures]

20. "household smoke".mp. [mp=title, abstract, heading word, table of contents, key concepts, original title, tests & measures]

21. "parental tobacco use".mp. [mp=title, abstract, heading word, table of contents, key concepts, original title, tests & measures]

22. "parent tobacco use".mp. [mp=title, abstract, heading word, table of contents, key concepts, original title, tests & measures]

23. "parental cigarette use".mp. [mp=title, abstract, heading word, table of contents, key concepts, original title, tests & measures]

24. "parent cigarette use".mp. [mp=title, abstract, heading word, table of contents, key concepts, original title, tests & measures]

25. "passive smoking".mp. [mp=title, abstract, heading word, table of contents, key concepts, original title, tests & measures]

26. "passive smoke".mp. [mp=title, abstract, heading word, table of contents, key concepts, original title, tests & measures]

27. passive smoking/

28. "environmental tobacco use".mp. [mp=title, abstract, heading word, table of contents, key concepts, original title, tests & measures]

29. "environmental cigarette use".mp. [mp=title, abstract, heading word, table of contents, key concepts, original title, tests & measures]

30. "environmental smoking".mp. [mp=title, abstract, heading word, table of contents, key concepts, original title, tests & measures]

31. "environmental smoke".mp. [mp=title, abstract, heading word, table of contents, key concepts, original title, tests & measures]

32. cognition*.mp. [mp=title, abstract, heading word, table of contents, key concepts, original title, tests & measures]

33. exp Cognition/

34. cognitive.mp. [mp=title, abstract, heading word, table of contents, key concepts, original title, tests & measures]

35. concept*.mp. [mp=title, abstract, heading word, table of contents, key concepts, original title, tests & measures]

36. exp Concepts/

37. belief*.mp. [mp=title, abstract, heading word, table of contents, key concepts, original title, tests & measures]

38. attitude*.mp. [mp=title, abstract, heading word, table of contents, key concepts, original title, tests & measures]

39. exp Attitudes/

40. expectation*.mp. [mp=title, abstract, heading word, table of contents, key concepts, original title, tests & measures]

41. exp Expectations/

42. expectanc*.mp. [mp=title, abstract, heading word, table of contents, key concepts, original title, tests & measures]

43. norm*.mp. [mp=title, abstract, heading word, table of contents, key concepts, original title, tests & measures]

44. prototype*.mp. [mp=title, abstract, heading word, table of contents, key concepts, original title, tests & measures]

45. intention*.mp. [mp=title, abstract, heading word, table of contents, key concepts, original title, tests & measures]

46. exp Intention/

47. motivation*.mp. [mp=title, abstract, heading word, table of contents, key concepts, original title, tests & measures]

48. exp Motivation/

49. willingness.mp. [mp=title, abstract, heading word, table of contents, key concepts, original title, tests & measures]

50. "self-efficacy".mp. [mp=title, abstract, heading word, table of contents, key concepts, original title, tests & measures]

51. exp Self Efficacy/

52. perception*.mp. [mp=title, abstract, heading word, table of contents, key concepts, original title, tests & measures]

53. exp Perception/

54. perceived.mp. [mp=title, abstract, heading word, table of contents, key concepts, original title, tests & measures]

55. schema*.mp. [mp=title, abstract, heading word, table of contents, key concepts, original title, tests & measures]

56. exp Schema/

57. scheme*.mp. [mp=title, abstract, heading word, table of contents, key concepts, original title, tests & measures]

58. adolesc*.mp. [mp=title, abstract, heading word, table of contents, key concepts, original title, tests & measures]

59. child*.mp. [mp=title, abstract, heading word, table of contents, key concepts, original title, tests & measures]

60. youth.mp. [mp=title, abstract, heading word, table of contents, key concepts, original title, tests & measures]

61. juvenile.mp. [mp=title, abstract, heading word, table of contents, key concepts, original title, tests & measures]

62. kid*.mp. [mp=title, abstract, heading word, table of contents, key concepts, original title, tests & measures]

63. offspring.mp. [mp=title, abstract, heading word, table of contents, key concepts, original title, tests & measures]

62. 1 or 2 or 3 or 4 or 5 or 6 or 7 or 8 or 9 or 10 or 11 or 12 or 13 or 14 or 15 or 16 or 17 or 18 or 19 or 20 or 21 or 22 or 23 or 24 or 25 or 26 or 27 or 28 or 29 or 30 or 31

63. 32 or 33 or 34 or 35 or 36 or 37 or 38 or 39 or 40 or 41 or 42 or 43 or 44 or 45 or 46 or 47 or 48 or 49 or 50 or 51 or 52 or 53 or 54 or 55 or 56 or 57

64. 58 or 59 or 60 or 61 or 62 or 63

65. 62 and 63 and 64

PubMed (20 February 2015): 1202 records retrieved

(“parental smoking” OR “parent smoking” OR “parental smoke” OR “maternal smoking” OR “maternal smoke” OR “paternal smoking” OR “paternal smoke” OR “mother smoking” OR “mother smoke” OR “father smoking” OR “secondhand smoke” OR “secondhand smoking” OR “second-hand smoke” OR “second-hand smoking” OR “second hand smoke” OR “second hand smoking” OR “household smoking” OR “household smoke” OR “parental tobacco use” OR “passive smoking” OR “passive smoke” OR “environmental smoke” OR “environmental smoking”) AND (cognition* OR cognitive OR concept* OR belief* OR attitude* OR expectation* OR expectanc* OR norm* OR prototype* OR intention* OR motivation* OR willingness OR “self-efficacy” OR perception* OR perceived OR scheme* OR schema*) AND (adolesc* OR child* OR youth OR juvenile OR kid* OR offspring)

**Search terms and results for implicit cognitions**

PsychInfo (20 February 2015): 197 records retrieved

1. ("Implicit cognitions" and smoking).mp. [mp=title, abstract, heading word, table of contents, key concepts, original title, tests & measures]
2. ("implicit attitude" and smoking).mp. [mp=title, abstract, heading word, table of contents, key concepts, original title, tests & measures]
3. ("implicit expectancies" and smoking).mp. [mp=title, abstract, heading word, table of contents, key concepts, original title, tests & measures]
4. ("implicit memory" and smoking).mp. [mp=title, abstract, heading word, table of contents, key concepts, original title, tests & measures]
5. ("implicit memory associations" and smoking).mp. [mp=title, abstract, heading word, table of contents, key concepts, original title, tests & measures]
6. ("implicit associations" and smoking).mp. [mp=title, abstract, heading word, table of contents, key concepts, original title, tests & measures]
7. ("automatic associations" and smoking).mp. [mp=title, abstract, heading word, table of contents, key concepts, original title, tests & measures]
8. ("automatic approach tendencies" and smoking).mp. [mp=title, abstract, heading word, table of contents, key concepts, original title, tests & measures]
9. ("attentional bias" and smoking).mp. [mp=title, abstract, heading word, table of contents, key concepts, original title, tests & measures]
10. ("selective attention" and smoking).mp. [mp=title, abstract, heading word, table of contents, key concepts, original title, tests & measures]

PubMed (20 February 2015): 174 records retrieved

("implicit cognitions” OR "implicit attitude" OR "implicit expectancies" OR "implicit memory" OR "implicit memory associations" OR "implicit associations" OR "automatic associations" OR "automatic approach tendencies" OR "attentional bias" OR "selective attention") AND "smoking"
